# Supplementary material
Source: HighWire-hosted journal article supplement (https://jmg.bmj.com/content/60/12/1186)
Supplement: inline-supplementary-material-1 [file inline-supplementary-material-1.pdf]

## Supplementary Tables

**Table S1.** Performance of the PRS methods on the validation sets of the BCAC-IL cohort.

| Method              | OR per 1SD        | Top 10% OR       | # of SNPs   |
|---------------------|-------------------|------------------|-------------|
| P+T (EUR LD)        | 1.48 ±0.04        | 2.33 ±0.32       | 1483±1230   |
| P+T (Target set LD) | 1.44 ±0.04        | 3.5 ±0.43        | 8591±12584  |
| LDPred2             | 1.41 ±0.04        | 2.66 ±0.58       | 740801±41   |
| Lassosum            | <b>1.59 ±0.05</b> | <b>3.0 ±0.19</b> | 65700±39569 |

In the nested CV scheme that we applied, in each split, the average OR per 1SD and the top 10% OR are computed over the validation sets (dark green in Figure 2). The last column is the average # of SNPs. Shown are means and standard deviations over the six splits.

**Table S2.** Performance of EUR PRS when excluding Polish and Israeli women from the discovery set and using these respective populations as the target cohorts.

Shown are means and standard deviations of the average performance obtained for the validation sets in each split (n=6).

| Method           | Target set cohort | OR per 1SD        | Top 10% OR        |
|------------------|-------------------|-------------------|-------------------|
| P+T (EUR)        | BCAC IL           | 1.42 ±0.03        | <b>2.39 ±0.18</b> |
|                  | BCAC PL           | <b>1.46 ±0.02</b> | 2.11 ±0.08        |
| P+T (Target set) | BCAC IL           | 1.39 ±0.03        | <b>2.3 ±0.23</b>  |
|                  | BCAC PL           | <b>1.5 ±0.04</b>  | 2.14 ±0.12        |
| LDPred           | BCAC IL           | <b>1.32±0.07</b>  | 1.61±0.09         |
|                  | BCAC PL           | 1.17±0.03         | <b>2.0±0.17</b>   |
| Lassosum         | BCAC IL           | <b>1.54 ±0.04</b> | 2.17±0.03         |
|                  | BCAC PL           | 1.53 ±0.03        | <b>3.13 ±0.24</b> |

## Supplementary Figures

**Figure S1.** PRS distribution of the holdout sets.

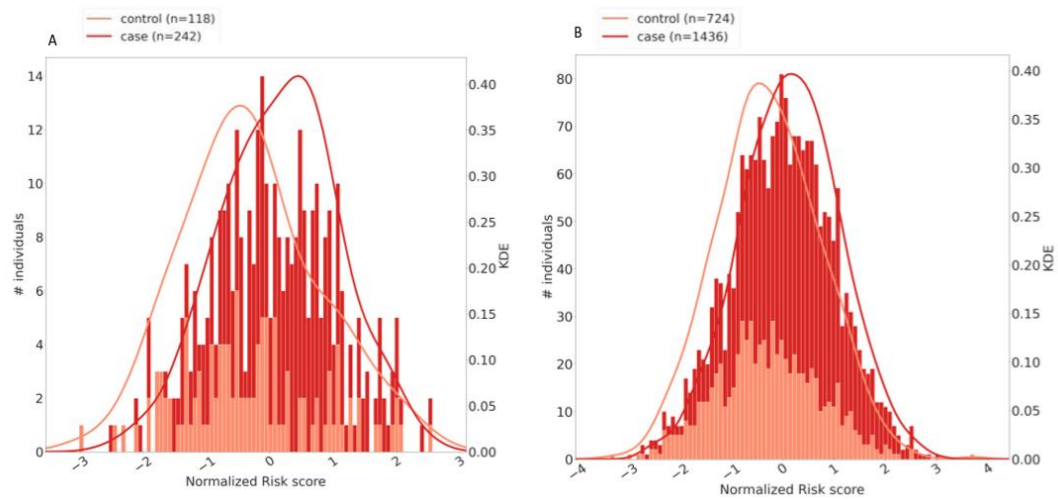

Scores were calculated using Lassosum with optimal hyperparameters. A: PRS on a single holdout set. B: Scores of all six holdout sets.

**Figure S2.** OR of BC risk as a function of BC-PRS percentiles on the validation sets.

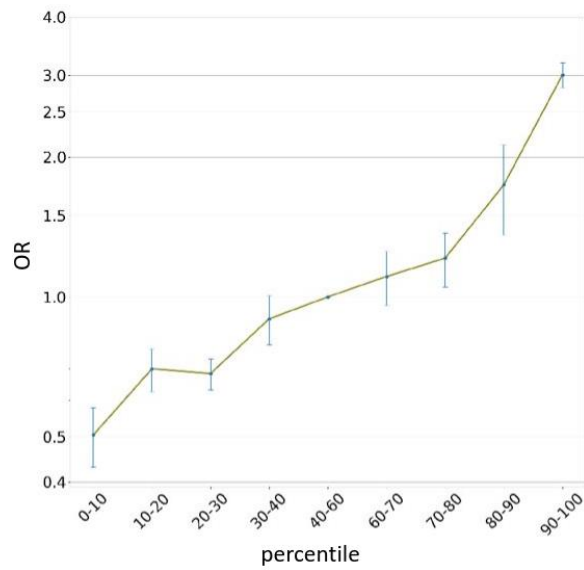

OR is measured relative to scores in the middle PRS quintile (40%-60%). PRS was generated by Lassosum. Shown are means and standard errors of the mean (SEM) over the average performance obtained on the validation sets in each split ( $n=6$ ).

**Figure S3.** Performance of P+T EUR-LD PRS models on the BCAC-IL cohort with and without BRCA 1/2 carriers as a function of the threshold parameter (T).

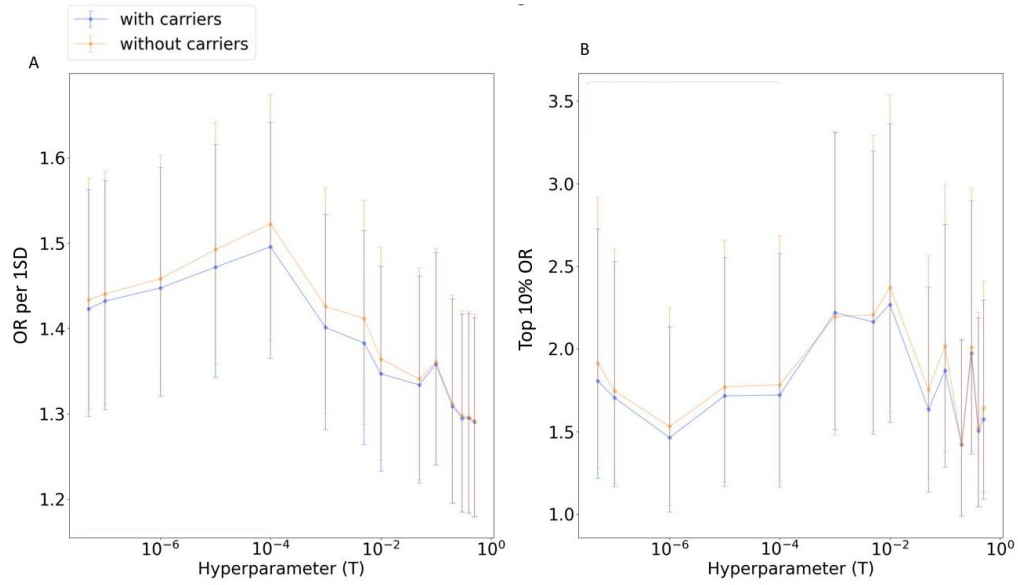

EUR GWAS was used as a discovery set. Performance measured by (A) OR per 1SD and (B) top-90% OR.

**Figure S4.** Outline of the generation of PRS model for HMC.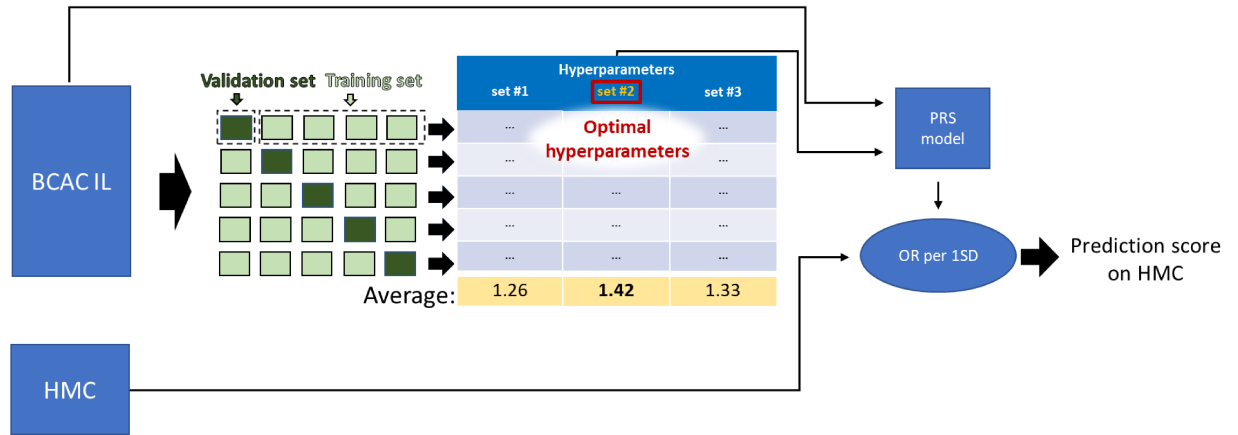

**Figure S5.** Average risk scores of patients in the BCAC-IL cohort stratified by age.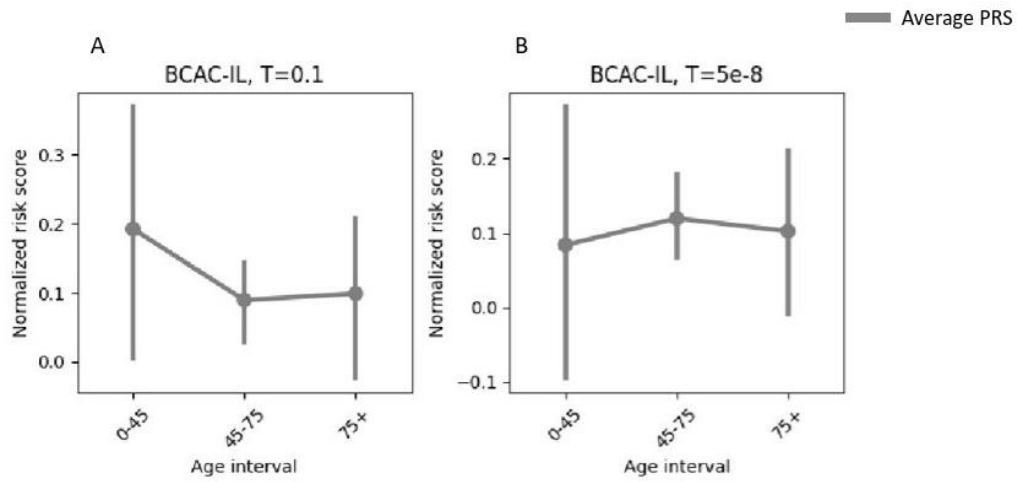

PRS obtained using GWAS of EUR individuals and the P+T EUR PRS method. P-value thresholds were (A)  $T = 0.1$  and (B)  $T = 5 \cdot 10^{-8}$ .
